# Supplementary material for: Combined Spectroscopic and Computational Study of Nitrobenzene Activation on Non-Noble Metals-Based Mono- and Bimetallic Catalysts
Source: MDPI journal article supplement (doi:10.3390/nano11082037), 2021-08-10
Supplement: s1 [file s1]

## Supplementary Materials

# Combined Spectroscopic and Computational Study of Nitrobenzene Activation on Non-Noble Metals-Based Mono- and Bimetallic Catalysts

Reisel Millán, María Dolores Soriano, Cristina Cerdá Moreno, Mercedes Boronat \* and Patricia Concepción \*

Instituto de Tecnología Química (UPV-CSIC), Universitat Politècnica de València—Consejo Superior de Investigaciones Científicas, Avda. de los Naranjos s/n, 46022 Valencia, Spain; reilmilca@itq.upv.es (R.M.); mdosorod@itq.upv.es (M.D.S.); cricermo@itq.upv.es (C.C.M.)

\* Correspondence: boronat@itq.upv.es (M.B.); pconcepc@upvnet.upv.es (P.C.)

### Characterization of monometallic samples

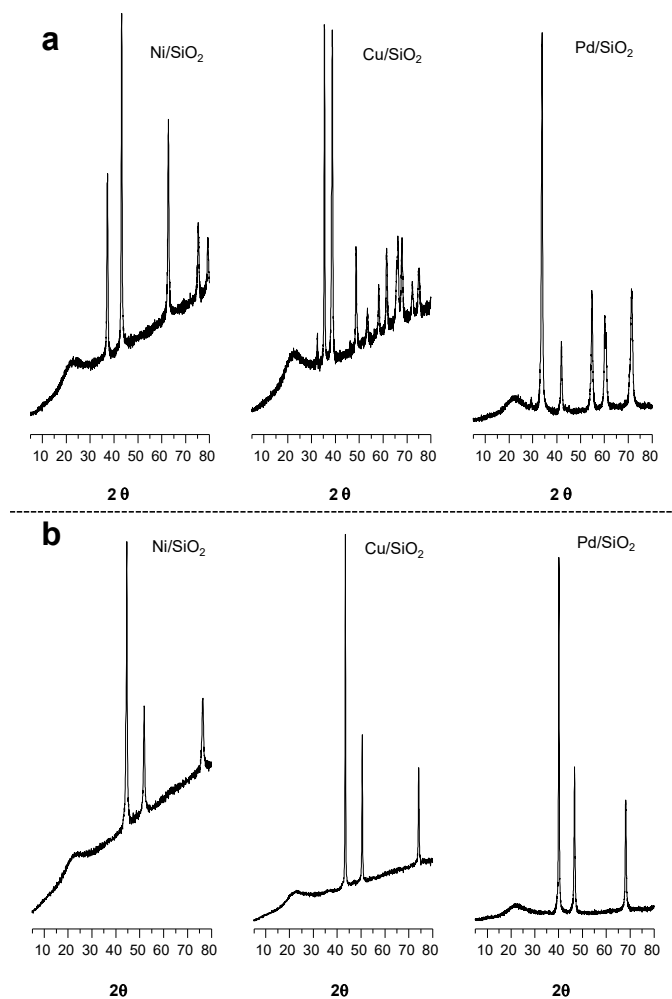

**Figure S1.** XRD pattern of the calcined (a) and (b) reduced monometallic Ni/SiO<sub>2</sub>, Cu/SiO<sub>2</sub> and Pd/SiO<sub>2</sub> catalysts.

## IR Study of nitrobenzene hydrogenation on monometallic samples

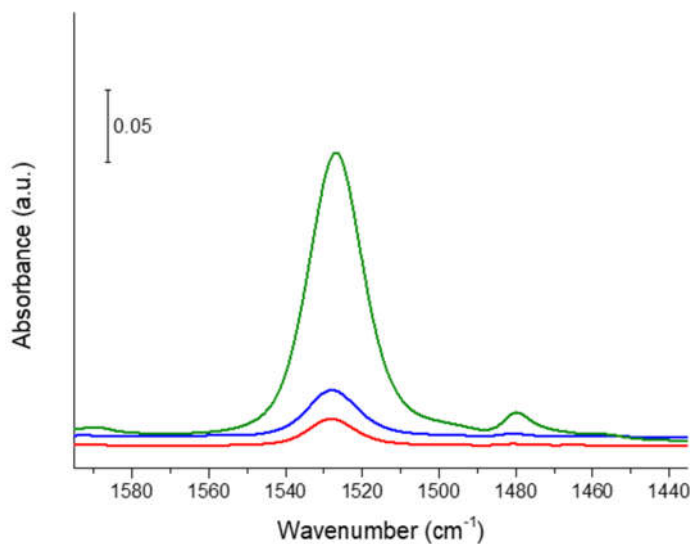

**Figure S2.** IR spectra of nitrobenzene adsorption at saturation coverage on Cu/SiO<sub>2</sub> (blue), Pd/SiO<sub>2</sub> (red), Ni/SiO<sub>2</sub> (green). Spectra normalized to sample weight. The lower intensity of the IR signal in the Cu/SiO<sub>2</sub> and Pd/SiO<sub>2</sub> samples agrees with the low interaction of nitrobenzene on both metals.

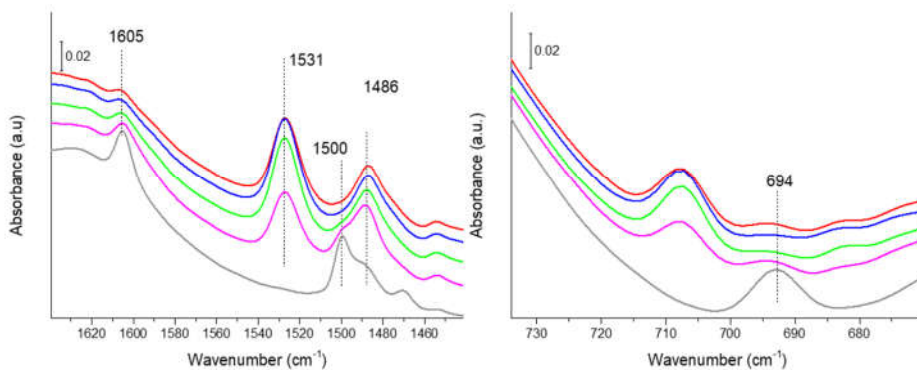

**Figure S3.** IR spectra of nitrosobenzene formed on the Ni/SiO<sub>2</sub> catalyst and after co-addition of H<sub>2</sub> at 25 °C (red line). Then, the temperature is increased to 90 °C (blue), 120 °C (green), 160 °C (magenta) and 200 °C (grey). Aniline formation (IR band at 1605, 1500 and 694 cm<sup>-1</sup>) is detected at 200 °C.

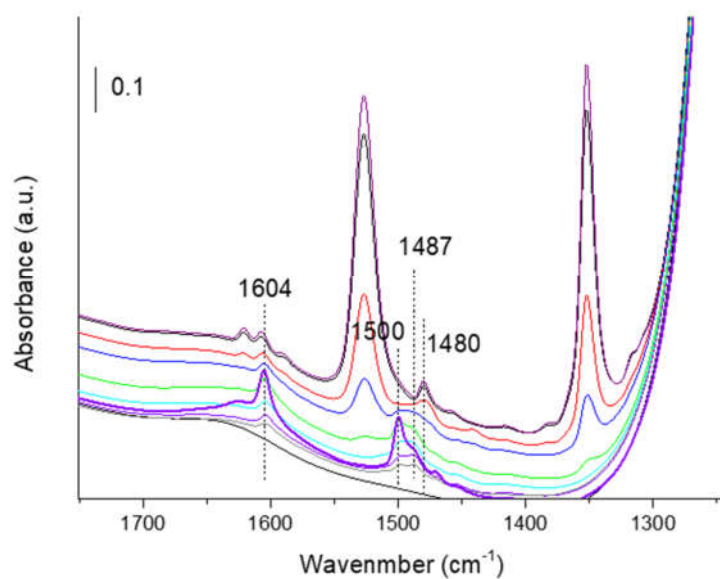

**Figure S4.** IR spectra of nitrobenzene and H<sub>2</sub> co-adsorbed on Ni/SiO<sub>2</sub>, and their reactivity at increasing reaction temperature: 25 °C (black), 60 °C (red), 90 °C (blue), 120 °C (green), 140 °C (cyan), 180 °C (violet), 200 °C (grey). In violet bold after cooling down the sample from 180 °C to 25 °C allowing re-adsorption of the gas phase.

## Characterization of bimetallic samples

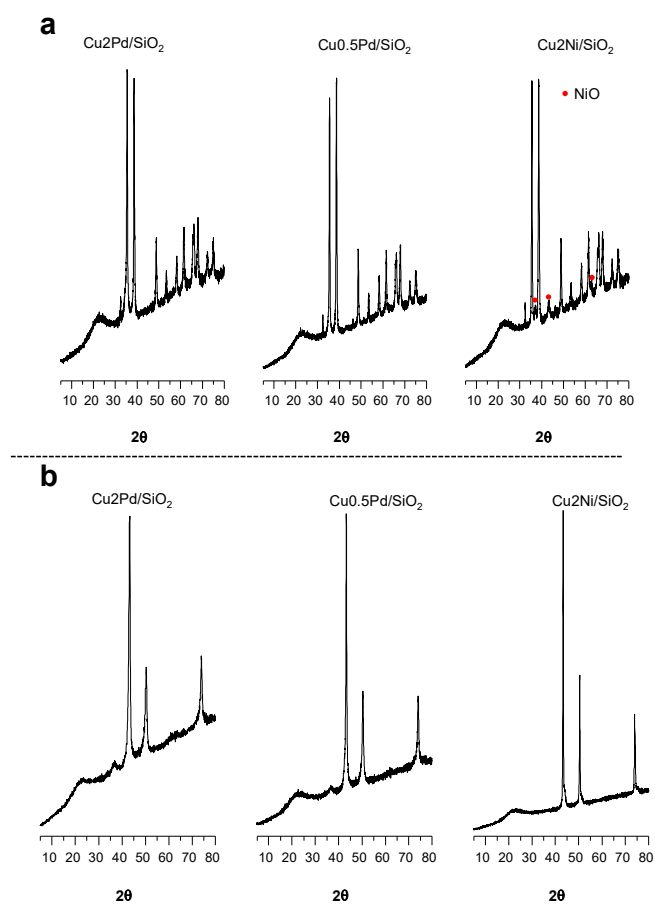

**Figure S5.** XRD pattern of the calcined (a) and (b) reduced bimetallic  $\text{Cu}_2\text{Pd}/\text{SiO}_2$ ,  $\text{Cu}_{0.5}\text{Pd}/\text{SiO}_2$  and  $\text{Cu}_2\text{Ni}/\text{SiO}_2$  catalysts.

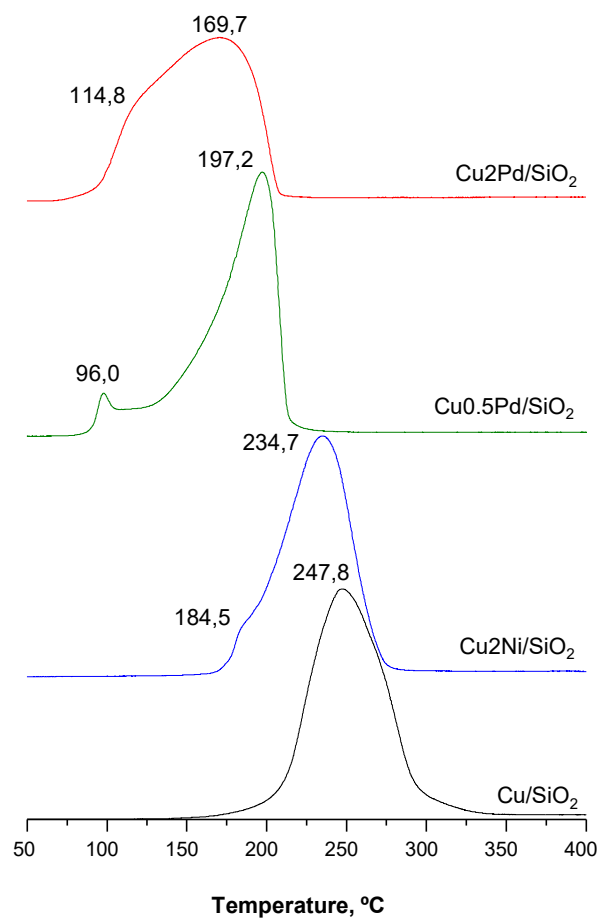

**Figure S6.** TPR-H<sub>2</sub> of monometallic Cu/SiO<sub>2</sub> and bimetallic Cu<sub>2</sub>Pd/SiO<sub>2</sub>, Cu<sub>0.5</sub>Pd/SiO<sub>2</sub> and Cu<sub>2</sub>Ni/SiO<sub>2</sub> catalysts . The addition of Pd or Ni to the Cu monometallic catalyst, favour H<sub>2</sub> activation (as determined from the H<sub>2</sub>D<sub>2</sub> isotopic exchange experiments), resulting in a higher catalyst reducibility.

**Table S1.** Surface composition determined by XPS.

| sample                                | Si: Pd (Ni): Cu | Pd(Ni)/Cu |
|---------------------------------------|-----------------|-----------|
| Cu <sub>0.5</sub> Pd/SiO <sub>2</sub> | 97: 0.5: 2.5    | 0.2       |
| Cu <sub>2</sub> Pd/SiO <sub>2</sub>   | 96: 0.7: 3.4    | 0.2       |
| Cu <sub>2</sub> Ni/SiO <sub>2</sub>   | 98: 0.6: 0.7    | 0.9       |

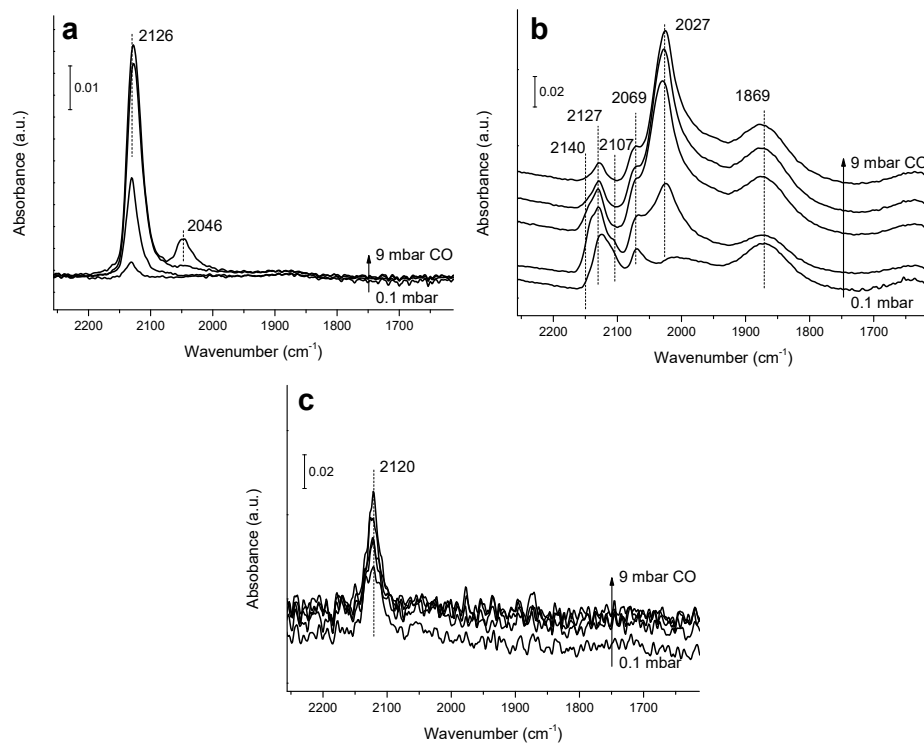

**Figure S7.** IR spectra of CO adsorption at  $-170\text{ }^{\circ}\text{C}$  on (a)  $\text{Cu}_{0.5}\text{Pd}/\text{SiO}_2$ , (b)  $\text{Cu}_2\text{Pd}/\text{SiO}_2$ , (c)  $\text{Cu}_2\text{Ni}/\text{SiO}_2$ .
